# Supplementary material for: Adverse Events Relating to Prolonged Hard Collar Immobilisation: A Systematic Review and Meta-Analysis
Source: PubMed Central journal article supplement (PMC9609519; doi:10.1177/21925682221087194), 2022-03-25
Supplement: sj-pdf-2-gsj-10.1177_21925682221087194.pdf [file sj-pdf-2-gsj-10.1177_21925682221087194.pdf]

Embase <1974 to 2021 April 09>

- 1 (hard collar\* or hard cervical collar\* or hard neck collar\*).mp. [mp=title, abstract, heading word, drug trade name, original title, device manufacturer, drug manufacturer, device trade name, keyword, floating subheading word, candidate term word] 190
- 2 (rigid collar\* or rigid cervical collar\* or rigid neck collar\*).mp. [mp=title, abstract, heading word, drug trade name, original title, device manufacturer, drug manufacturer, device trade name, keyword, floating subheading word, candidate term word] 321
- 3 (rigid orthosis\* or rigid cervical orthosis\* or rigid neck orthosis\*).mp. [mp=title, abstract, heading word, drug trade name, original title, device manufacturer, drug manufacturer, device trade name, keyword, floating subheading word, candidate term word] 68
- 4 orthotic device\*.mp. 994
- 5 brace\*.mp. 15759
- 6 exp rigid collar/ 87
- 7 exp orthotics/ 3890
- 8 exp spinal brace/ 728
- 9 1 or 2 or 3 or 4 or 5 or 6 or 7 or 8 20403
- 10 complicat\*.mp. 3195759
- 11 adverse event\*.mp. 338444
- 12 adverse effect\*.mp. 260743
- 13 adverse outcome\*.mp. 80827
- 14 exp complication/ 1244977
- 15 exp postoperative complication/ 703759
- 16 exp adverse event/ 660328
- 17 exp adverse outcome/ 53891
- 18 exp adverse device effect/ 52213
- 19 10 or 11 or 12 or 13 or 14 or 15 or 16 or 17 or 18 4391179
- 20 cervical spin\*.mp. 70291
- 21 cervical vertebr\*.mp. 10836
- 22 exp cervical spine/ 38567
- 23 exp cervical vertebra/4711
- 24 20 or 21 or 22 or 23 75193
- 25 9 and 19 and 24 449

<https://ovidsp.ovid.com/athens/ovidweb.cgi?T=JS&NEWS=N&PAGE=main&SHAREDSEARCHID=3ZybPX4EhUNaESeiqahHMa2xFMbDyFhFrgVNaBRvlqkwNCvqZcGhI93P7pejij3w9>

Ovid MEDLINE(R) and Epub Ahead of Print, In-Process, In-Data-Review & Other Non-Indexed Citations, Daily and Versions(R) <1946 to April 09, 2021>

- 1 (hard collar\* or hard cervical collar\* or hard neck collar\*).mp. [mp=title, abstract, original title, name of substance word, subject heading word, floating sub-heading word, keyword heading word, organism supplementary concept word, protocol supplementary concept word, rare disease supplementary concept word, unique identifier, synonyms] 137
- 2 (rigid collar\* or rigid cervical collar\* or rigid neck collar\*).mp. [mp=title, abstract, original title, name of substance word, subject heading word, floating sub-heading word, keyword heading word, organism supplementary concept word, protocol supplementary concept word, rare disease supplementary concept word, unique identifier, synonyms] 221
- 3 (rigid orthosis\* or rigid cervical orthosis\* or rigid neck orthosis\*).mp. [mp=title, abstract, original title, name of substance word, subject heading word, floating sub-heading word, keyword heading word, organism supplementary concept word, protocol supplementary concept word, rare disease supplementary concept word, unique identifier, synonyms] 54
- 4 orthotic device\*.mp. 6917
- 5 brace\*.mp. 10567
- 6 exp orthotic devices/ 15356
- 7 exp braces/ 5631
- 8 1 or 2 or 3 or 4 or 5 or 6 or 7 20555
- 9 complicat\*.mp. 3301678
- 10 adverse event\*.mp. 175510
- 11 adverse effect\*.mp. 1903140
- 12 adverse outcome\*.mp. 31569
- 13 exp Postoperative Complications/ 562038
- 14 exp Long Term Adverse Effects/ 649
- 15 9 or 10 or 11 or 12 or 13 or 14 4875695
- 16 cervical spin\*.mp. 31356
- 17 cervical vertebr\*.mp. 40710
- 18 exp Cervical Vertebrae/ 40315
- 19 16 or 17 or 18 57454
- 20 8 and 15 and 19 512

<https://ovidsp.ovid.com/athens/ovidweb.cgi?T=JS&NEWS=N&PAGE=main&SHAREDSEARCHID=3ZybPX4EhUNaESeiqahHMaPpRssFfOSOK0eaqxVG0TpAo6uTuZgWxNvSK61YkEI6M>
