# Supplementary material for: Adverse Events Relating to Prolonged Hard Collar Immobilisation: A Systematic Review and Meta-Analysis
Source: PubMed Central journal article supplement (PMC9609519; doi:10.1177/21925682221087194), 2022-03-25
Supplement: sj-pdf-4-gsj-10.1177_21925682221087194.pdf [file sj-pdf-4-gsj-10.1177_21925682221087194.pdf]

Supplementary Material 4. Summary table of included studies which are not cohort studies.

| Authors                    | Year | Country   | Type of Study            | Mean Patient Age, yrs | Collar Indication                | Collar Type | Reported Complications                                                            | Mean Duration of Wear, Days |
|----------------------------|------|-----------|--------------------------|-----------------------|----------------------------------|-------------|-----------------------------------------------------------------------------------|-----------------------------|
| Rodgers and Rodgers        | 1995 | USA       | Case report              | 30                    | Trauma                           | Vertebrace  | Unilateral marginal mandibular nerve palsy (1 patient)                            | 5                           |
| Ladny <i>et al.</i>        | 2020 | Poland    | Randomised trial         | 34                    | Clinical trial                   | Various     | Increased optic nerve sheath diameter                                             | 5                           |
| Hewitt                     | 1994 | UK        | Case report              | 19                    | Trauma                           | NR          | Skin necrosis over mandible (1 patient)                                           | 2                           |
| Liew and Hill              | 1994 | Australia | Case series              | 55.5                  | Trauma                           | NR          | Skin breakdown/ulceration                                                         | 8                           |
| Powers                     | 1997 | USA       | Case series <sup>a</sup> | NR                    | Trauma                           | Various     | Skin breakdown/ulceration                                                         | 10.85                       |
| Webber-Jones <i>et al.</i> | 2002 | USA       | Narrative review         | NA                    | NR                               | Various     | Skin breakdown/ulceration<br>Dysphagia<br>Increased ICP                           | NA                          |
| Waqar <i>et al.</i>        | 2014 | UK        | Systematic review        | NR                    | Trauma (Odontoid fracture)       | Various     | Skin breakdown/ulceration<br>Medical complications (e.g., pneumonia)              | NR                          |
| Peck <i>et al.</i>         | 2018 | UK        | Narrative review         | NA <sup>b</sup>       | Acute and chronic spinal disease | Various     | Skin breakdown/ulceration<br>Increased ICP<br>Dysphagia<br>Respiratory compromise | NA                          |
| Lacey <i>et al.</i>        | 2019 | USA       | Narrative review         | NA                    | Trauma                           | Various     | Skin breakdown/ulceration                                                         | NA                          |
| Zarghooni <i>et al.</i>    | 2013 | Germany   | Narrative review         | NA                    | Acute and chronic spinal disease | NR          | Skin breakdown/ulceration<br>Dysphagia                                            | NA                          |
| Dunham <i>et al.</i>       | 2008 | USA       | Narrative review         | NA                    | Trauma                           | NR          | Increased ICP                                                                     | NA                          |
| Ertel <i>et al.</i>        | 2016 | USA       | Economic evaluation      | NA                    | Trauma                           | NR          | Skin breakdown/ulceration                                                         | NA                          |

NR = Not reported, NA = Not applicable, ICP = Intracranial pressure

<sup>a</sup>*NB* The included reviews primarily discuss the included cohort studies

<sup>a</sup>This study also incorporated a quality improvement exercise

<sup>b</sup>A specific focus on elderly patients.
